# Supplementary material for: Effect of the chemical composition of filter media on the microbial community in wastewater biofilms at different temperatures
Source: Royal Society of Chemistry journal article supplement (doi:10.1039/c6ra21040f), 2016-01-01
Supplement: c6ra21040f1.pdf [file c6ra21040f1.pdf]

**Table S1** Barcodes used for different biofilm samples

| Description of biofilm samples | Barcode Sequence |
|--------------------------------|------------------|
| Stone 10°C                     | AAAACACA         |
| Tyre- derived rubber10°C       | AAAACGAC         |
| Stone 20°C                     | AAAACGAG         |
| Tyre -derived rubber 20°C      | AAAACACC         |
| Stone 30°C                     | AAAACGCC         |
| Tyre- derived rubber 30°C      | AAAACGCG         |

**Table S2** Physico-chemical properties of the influent and effluent from aerobic reactors at different temperature conditions for stone (ST) and tire derived rubber (TDR) media

| Temperature (°C) | Parameters analyzed |          | Media material |              |
|------------------|---------------------|----------|----------------|--------------|
|                  |                     |          | ST             | TDR          |
| 10               | BOD (mg/L)          | Influent | 320.83 ±13.15  | 320.83±13.15 |
|                  |                     | Effluent | 208.91±09.5    | 184.87±13.8  |
|                  | DO (mg/L)           | Influent | 2.06±0.03      | 2.06±0.03    |
|                  |                     | Effluent | 4.83±1.0       | 5.9±0.7      |
|                  | pH                  | Influent | 7.30±0.2       | 7.30±0.2     |
|                  |                     | Effluent | 7.24±1.02      | 7.04±0.8     |
| 20               | BOD (mg/L)          | Influent | 378.09±26.9    | 378.09±26.9  |
|                  |                     | Effluent | 278.66±10.12   | 246.16±7.67  |
|                  | DO (mg/L)           | Influent | 1.95±0.7       | 1.95±0.7     |
|                  |                     | Effluent | 5.37±1.1       | 5.95±0.8     |
|                  | pH                  | Influent | 7.86±0.3       | 7.86±0.3     |
|                  |                     | Effluent | 7.47±0.6       | 7.63±0.8     |
| 30               | BOD (mg/L)          | Influent | 320.83±13.15   | 320.83±13.15 |
|                  |                     | Effluent | 181.77±10.09   | 117.2±22.63  |
|                  | DO (mg/L)           | Influent | 2.06±0.03      | 2.06±0.03    |
|                  |                     | Effluent | 5.84±1.0       | 6.86±1.02    |
|                  | pH                  | Influent | 7.30±±0.2      | 7.30±±0.2    |
|                  |                     | Effluent | 7.03±0.4       | 6.76±0.21    |

**Key = ± Standard Deviation**

**Table S3** MOTHUR diversity indices of bacterial communities in twelve aerobic biofilm samples developed on stone (ST) and tire derived rubber (TDR) media

|          | Nseqs | Sobs | Chao     | Chao_Lci | Chao_Hci | Ici      | Hci      | Ace      | Ace_Lci  | Ace_Hci  | Lci      | Hci      | Invsimpson | Lci      | Hci      | Coverage |
|----------|-------|------|----------|----------|----------|----------|----------|----------|----------|----------|----------|----------|------------|----------|----------|----------|
| ST10°C   | 2004  | 289  | 404.9565 | 362.78   | 471.2433 | 29.82329 | 46.87182 | 464.4569 | 410.2067 | 542.9886 | 38.36069 | 55.53034 | 8.620901   | 0.598613 | 0.744912 | 0.936627 |
| TDR 10°C | 1714  | 270  | 402.2553 | 351.0448 | 485.8247 | 36.21131 | 59.09249 | 485.2294 | 434.3552 | 551.851  | 35.97345 | 47.10859 | 42.74893   | 2.838531 | 3.494899 | 0.934656 |
| ST20°C   | 2272  | 257  | 379.9362 | 331.8071 | 459.0302 | 34.03236 | 55.92792 | 476.9426 | 424.696  | 545.4668 | 36.9439  | 48.45396 | 17.84281   | 0.986054 | 1.168737 | 0.952465 |
| TDR 20°C | 1909  | 347  | 608.0169 | 521.3074 | 737.8604 | 61.31292 | 91.81315 | 823.0073 | 734.5902 | 931.5942 | 62.52035 | 76.78251 | 42.70273   | 2.638934 | 3.197896 | 0.907805 |
| ST 30°C  | 1324  | 256  | 383.5532 | 333.8942 | 464.8708 | 35.11423 | 57.50021 | 395.6414 | 349.7696 | 463.9533 | 32.4362  | 48.30385 | 45.5353    | 4.121054 | 5.538898 | 0.916918 |
| TDR 30°C | 2919  | 266  | 406.0217 | 351.999  | 493.9804 | 38.19983 | 62.19614 | 487.4798 | 435.1462 | 556.0053 | 37.00545 | 48.45488 | 9.358689   | 0.415459 | 0.475116 | 0.960946 |

**Key:** nseqs: number of reads analysed, sobs: species observed at the cut-off value (no of observed OTUs), ace: abundance-based coverage estimator, chao: abundance-based estimator Chao1, Coverage: Good's coverage. lci and hci: lower and higher confidence interval, respectively.

**Table S4** The 16 genera frequently identified in all biofilm samples from stone (ST) and tire derived rubber (TDR) media

| <b>Genus</b>             | <b>Original Abundance</b> |                                          |
|--------------------------|---------------------------|------------------------------------------|
|                          | <b>Stone (ST) biofilm</b> | <b>Tyre derived rubber (TDR) biofilm</b> |
| <i>Reheinmera</i>        | 1019                      | 99                                       |
| <i>Rhodococcus</i>       | 26                        | 840                                      |
| <i>Aquabacterium</i>     | 4                         | 830                                      |
| <i>Trichococcus</i>      | 130                       | 31                                       |
| <i>Acidovorax</i>        | 296                       | 167                                      |
| <i>Flavobacterium</i>    | 242                       | 43                                       |
| <i>Aeromonas</i>         | 235                       | 29                                       |
| <i>Sediminibacterium</i> | 143                       | 52                                       |
| <i>Hydrogenophaga</i>    | 94                        | 123                                      |
| <i>Aquimonas</i>         | 48                        | 293                                      |
| <i>Brevundimonas</i>     | 96                        | 40                                       |
| <i>Pseudoxanthomonas</i> | 89                        | 97                                       |
| <i>Rhizobacter</i>       | 22                        | 183                                      |
| <i>Zoogloea</i>          | 19                        | 13                                       |
| <i>Arenimonas</i>        | 36                        | 117                                      |
| <i>Dechloromonas</i>     | 38                        | 19                                       |
| <i>Stenotrophomonas</i>  | 62                        | 99                                       |

**Table S5** *P*-values between biofilm samples developed on tyre derived rubber (TDR) media at 10 and 30°C

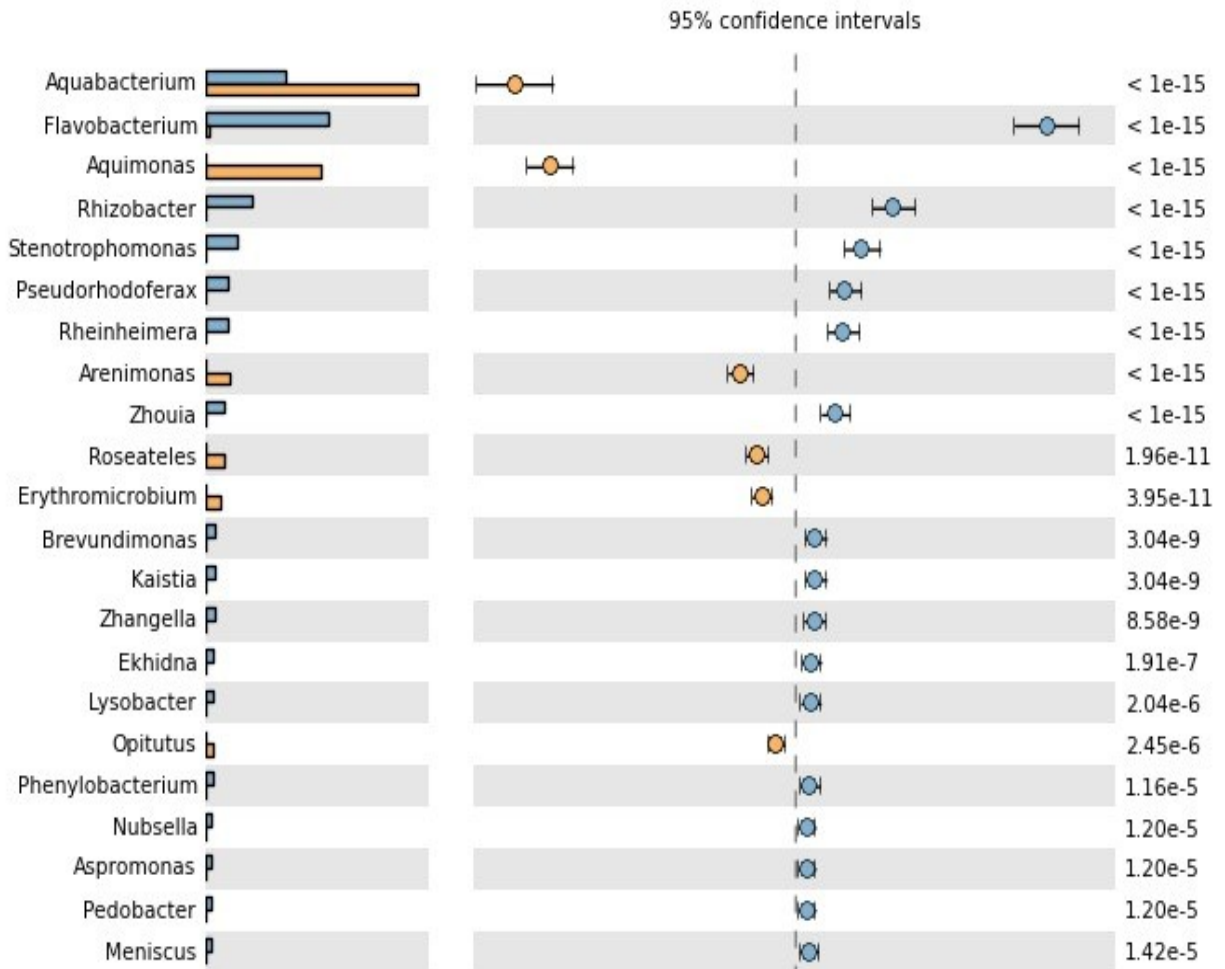

**Key:** Blue color bars indicating *P*-values between biofilm samples developed at 10°C, Orange color bars indicating *P*-values between biofilm samples developed at 30°C.

**Table S6** *P*-values between biofilm samples developed on stone (ST) media at 10 and 30°C

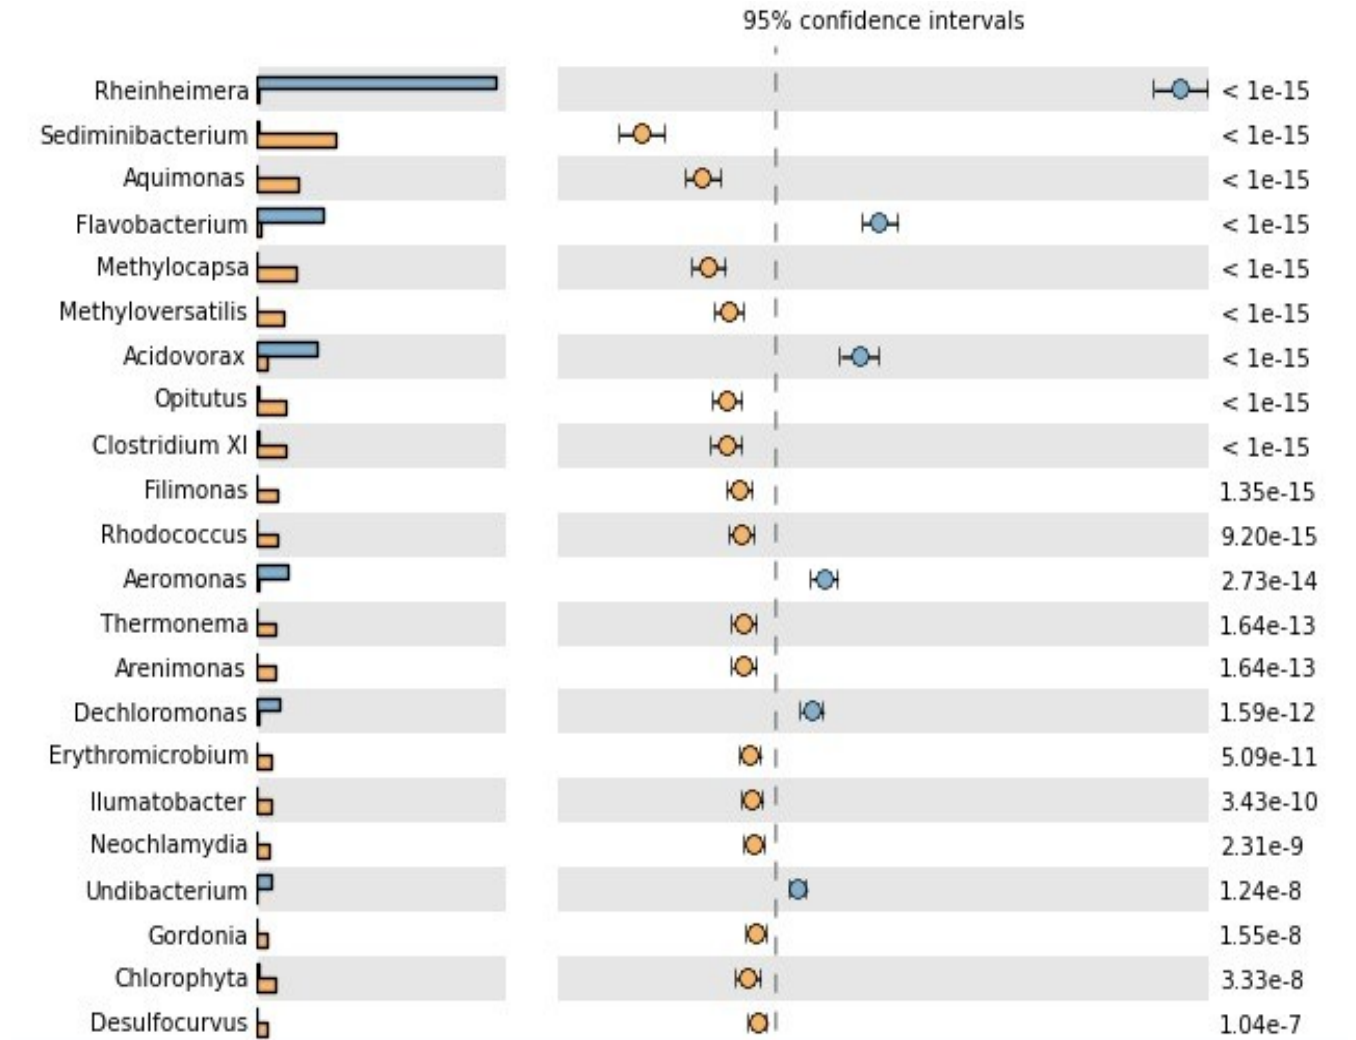

**Key:** Blue color bars indicate *P*-values between biofilm samples developed at 10°C, Orange color bars indicate *P*-values between biofilm samples developed at 30°C.
